# Supplementary material for: Assessment and improvement of HIV screening rates in a Midwest primary care practice using an electronic clinical decision support system: a quality improvement study
Source: PubMed Central journal article supplement (PMC4932674; doi:10.1186/s12911-016-0320-5), 2016-07-04
Supplement: 12911_2016_320_MOESM1_ESM.pdf [file 12911_2016_320_MOESM1_ESM.pdf]

**APPENDIX**

**Assessment and improvement of HIV screening rates in a Midwest primary care practice using an electronic clinical decision support system (Marcelin, JR et al.)**

**eTable 1. Labs used to check for “Prior HIV Screen”**

| <b>ROCLIS/ROCMIC Institution Test Code</b> | <b>Test Description</b>             |
|--------------------------------------------|-------------------------------------|
| 26312-ROCLIS                               | HIV-1/-2 Ab Screen, S               |
| 81762- ROCLIS                              | HIV-1/HIV-2 Ab Rapid, P             |
| 9333-ROCLIS                                | HIV-1/-2 Ab Evaluation, S           |
| 32471-ROCLIS                               | HIV-1/HIV-2 Ab Rapid, P             |
| M62420-ROCLIS                              | HIV-1/-2 Ag and Ab Screen, S-PHDICT |

**eTable 2. Codes used to check for HIV diagnosis**

| <b>Description</b>                                       | <b>ICD9</b> | <b>Code</b> |
|----------------------------------------------------------|-------------|-------------|
| HIV                                                      | 042         | 2200670     |
| HIV Asymptomatic                                         | V08         | 2214827     |
| HIV Encephalopathy                                       | 042         | 2216035     |
| HIV Nephropathy                                          | 042         | 2216955     |
| HIV or AIDS In Preg Antepartum                           | 647.63      | 2222274     |
| HIV or AIDS In Preg Postpartum                           | 647.64      | 2222275     |
| HIV Positive                                             | 042         | 2216000     |
| HIV Serology Nonspecific                                 | 795.71      | 2211651     |
| HIV Type2 Infection NOS                                  | 079.53      | 2200949     |
| HIV w/ AIDS                                              | 042         | 2216001     |
| Dementia from HIV                                        | 042         | 2219448     |
| Dementia from HIV w/ Behav. Problem                      | 042         | 2219449     |
| Facial Ids w/ HIV (Facial Lipodystrophy Syndrome w/ HIV) | 272.6       | 2224370     |
| Facial Lipodystrophy Syndrome w/ HIV                     | 272.6       | 2224370     |
| Wasting Syndrome from HIV                                | 799.4       | 2216995     |

## APPENDIX

### Assessment and improvement of HIV screening rates in a Midwest primary care practice using an electronic clinical decision support system (*Marcelin, JR et al.*)

#### eAppendix 1:

##### *Pre-intervention Survey: HIV Screening in PCIM (Primary Care Internal Medicine)*

1. Do you screen all eligible patients for HIV?
  - A. Yes
  - B. No
  - C. I'm not sure which patients are eligible for screening
  
2. Which of the following best describes your HIV screening practices?
  - A. I screen all patients for HIV according to current guidelines
  - B. I screen most patients for HIV
  - C. I screen only high risk patients for HIV
  - D. I never screen asymptomatic patients for HIV
  
3. If you have not screened patients for HIV, what factor(s) lead to this decision?
  - A. Not familiar with current screening guidelines
  - B. Don't remember to discuss screening with patients
  - C. Patients refuse HIV screening
  - D. Unaware if patients have been screened before
  - E. Don't believe in screening patients if I perceive them to be lower risk
  - F. This discussion is too uncomfortable or awkward
  - G. Unsure if consent is required
  - H. Other (please specify)
  
4. Are you familiar with current HIV screening guidelines?
  - A. I am familiar with the guidelines
  - B. I am aware they exist but do not know exactly what they are
  - C. I did not know that there were specific HIV screening guidelines
  
5. If GDMS had an HIV screening prompt, would you screen more patients for HIV?
  - A. Yes
  - B. No
  - C. Not applicable; I already screen every eligible patient according to guidelines
  
6. What is your gender?
  - A. Female
  - B. Male
  
7. What is your current post-graduate year?
  - A. PGY-1
  - B. PGY-2
  - C. PGY-3
  - D. PGY-4 or higher
  - E. Staff Physician
  - F. NP/PA or other non-physician provider
  
8. Do you have comments or suggestions on what would help you to screen more patients for HIV?

## APPENDIX

### Assessment and improvement of HIV screening rates in a Midwest primary care practice using an electronic clinical decision support system (*Marcelin, JR et al.*)

#### eAppendix2:

*\*Post-intervention Survey: HIV Screening in PCIM (Primary Care Internal Medicine)*

1. Are you aware of the HIV screening recommendation prompt on GDMS?
  - A. Yes
  - B. No
  
2. Since the implementation of the HIV screening prompt on GDMS, which of the following best describes your HIV screening practices?
  - A. I now screen all eligible patients for HIV according to current guidelines
  - B. I try to screen most eligible patients for HIV
  - C. I still screen only high risk patients for HIV
  - D. I never screen asymptomatic patients for HIV
  
3. If you have utilized the HIV screening prompt on GDMS, what has been the patient response?
  - A. More patients agree to the test
  - B. Patients still refuse the test
  - C. It has not made a difference
  
4. Would you be more likely to screen for HIV if GDMS made the recommendation available for the patient also?
  - A. Yes
  - B. No
  - C. Not Necessarily
  
5. Did the intervention help to educate you about HIV screening?
  - A. Yes
  - B. No
  
6. Do you think providers need more education about HIV screening?
  - A. Yes
  - B. No
  
7. Do you have enough time to discuss HIV testing at the point of care?
  - A. Yes
  - B. No
  
8. Should HIV testing discussion be initiated by rooming personnel prior to the face-to-face provider visits?
  - A. Yes
  - B. No
  
9. What is your gender?
  - A. Male
  - B. Female
  - C. Other
    - Define Other \_\_\_\_\_
  
10. What is your current post-graduate year?
  - A. PGY-1
  - B. PGY-2
  - C. PGY-3
  - D. PGY-4 or higher (but still in training)
  - E. Staff Physician
  - F. NP/PA or other non-physician provider
  
11. Do you have any last comments that you believe would be helpful in improving HIV screening in PCIM?
